# Supplementary material
Source: PubMed Central journal article supplement (PMC7191174)
Supplement: ajtr0012-1428-f7.pdf [file ajtr0012-1428-f7.pdf]

# CD151 suppresses prostate cancer

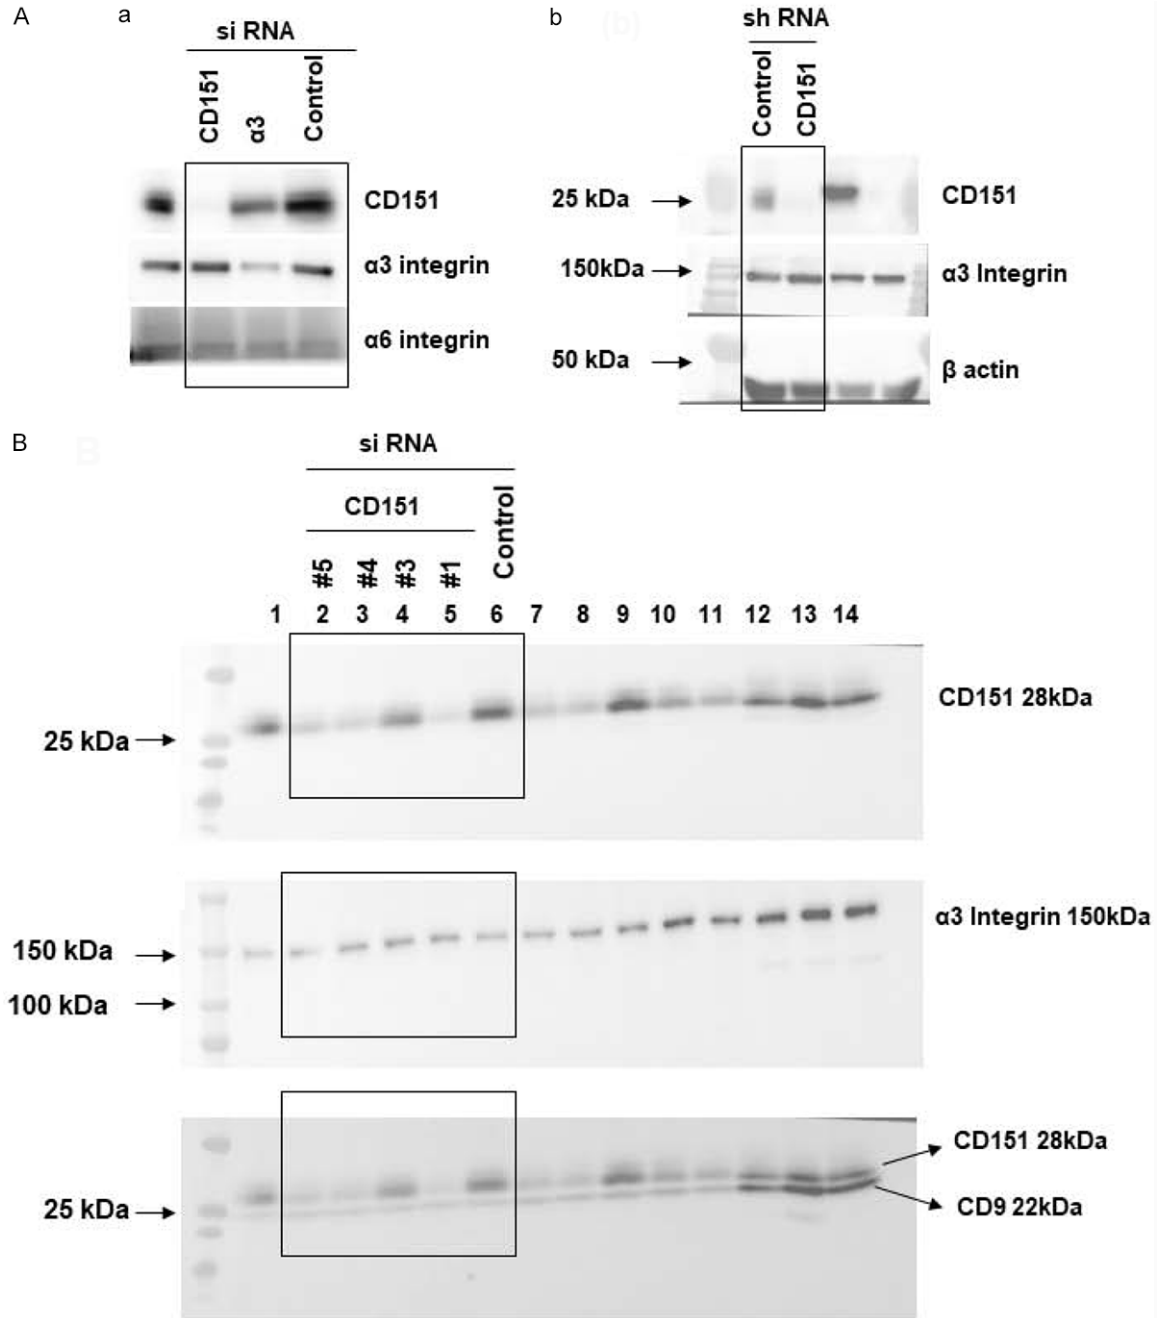

**Figure S1.** The original blot for immunoblots in **Figure 5. A (a, b)**. The original blot for the panel A (a, b) of **Figure 5. B**. The original blot for the panel B (a) of **Figure 5**.
